# Supplementary material
Source: PubMed Central journal article supplement (PMC6167915)
Supplement: mmc1.pdf [file mmc1.pdf]

## Supplemental Information

### Hypothalamic-Pituitary Axis Regulates

### Hydrogen Sulfide Production

**Christopher Hine, Hyo-Jeong Kim, Yan Zhu, Eylul Harputlugil, Alban Longchamp, Marina Souza Matos, Preeti Ramadoss, Kevin Bauerle, Lear Brace, John M. Asara, C. Keith Ozaki, Sheue-yann Cheng, Subhankar Singha, Kyo Han Ahn, Alec Kimmelman, Ffolliott M. Fisher, Pavlos Pissios, Dominic J. Withers, Colin Selman, Rui Wang, Kelvin Yen, Valter D. Longo, Pinchas Cohen, Andrzej Bartke, John J. Kopchick, Richard Miller, Anthony N. Hollenberg, and James R. Mitchell**

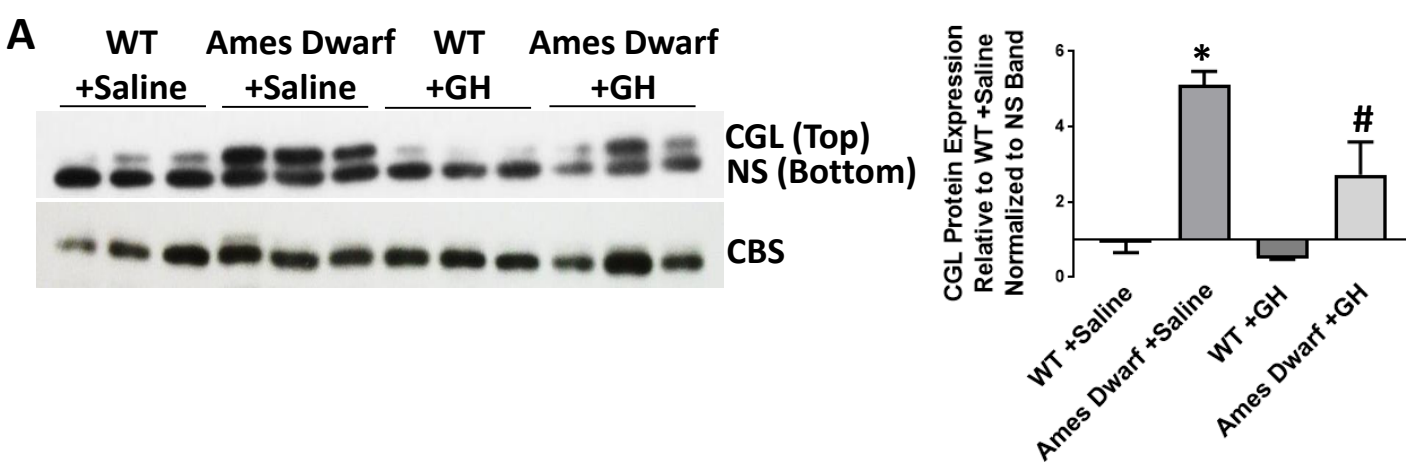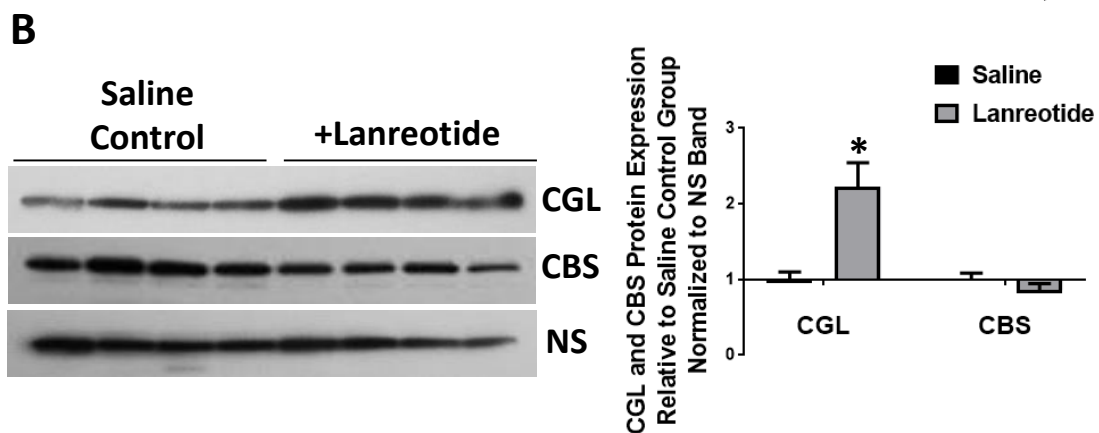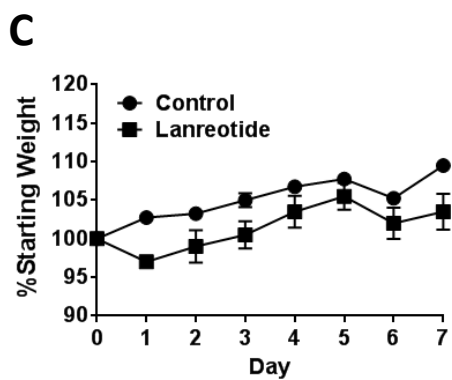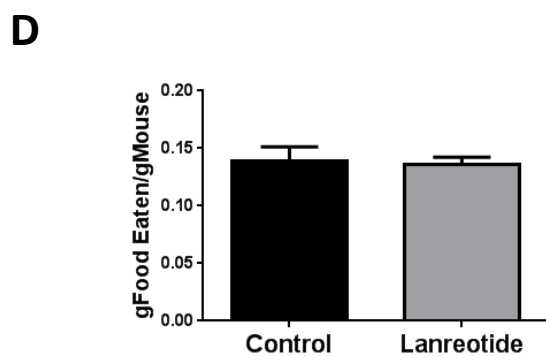

Figure S1

**A**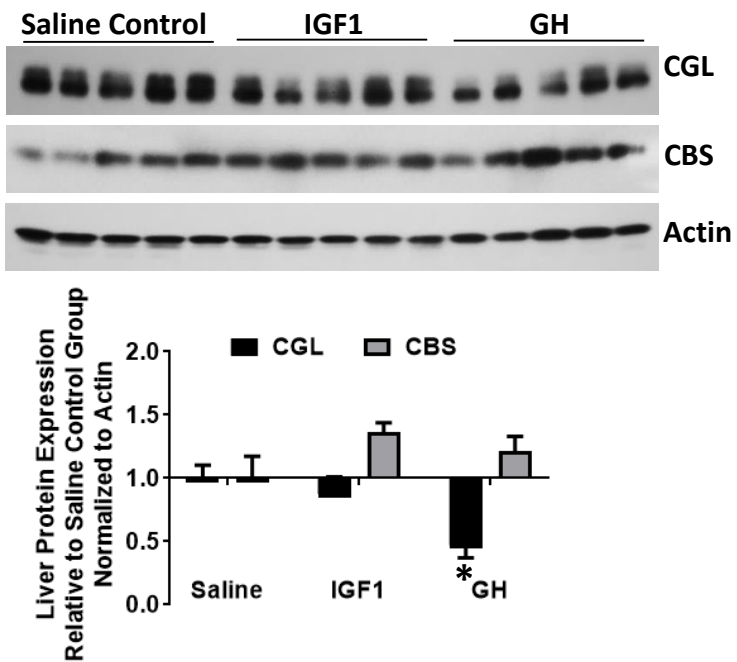**B**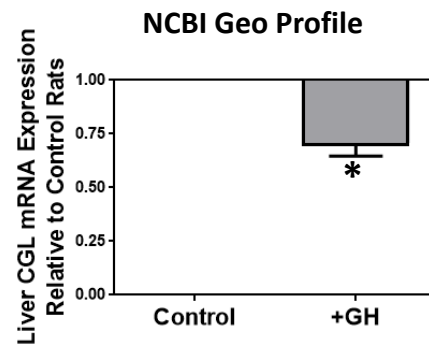**C**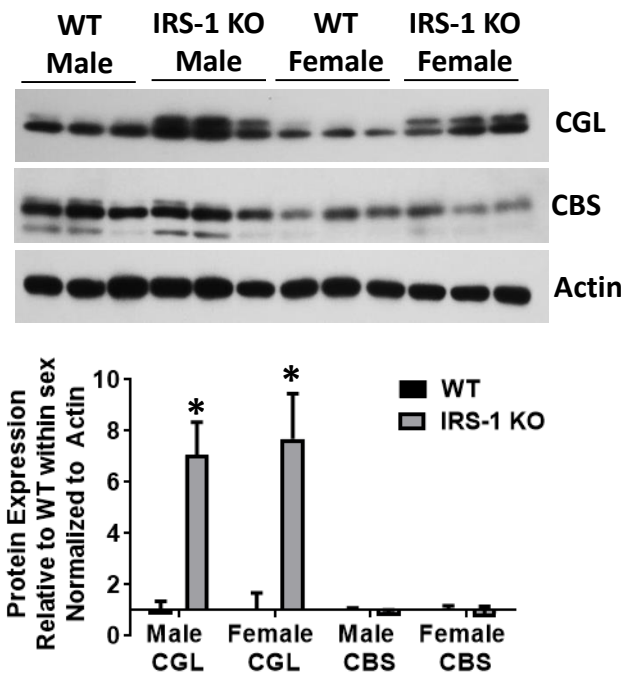**D**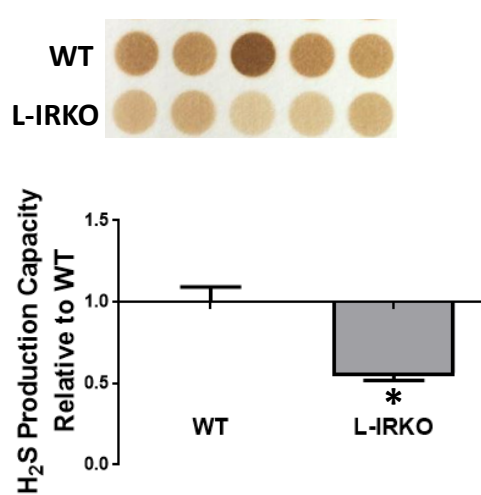**E**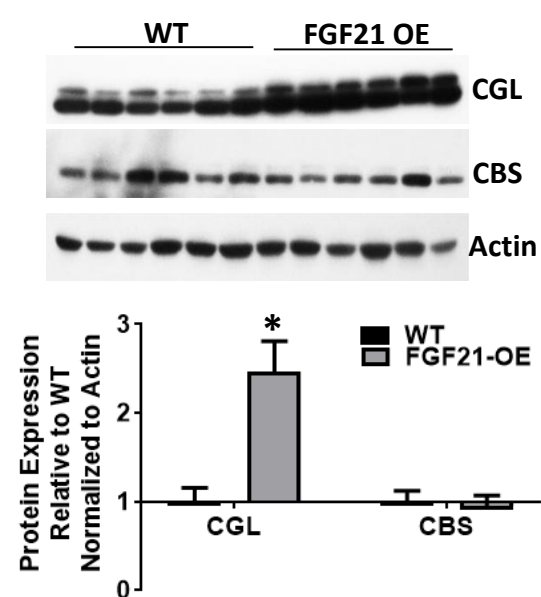

Figure S2

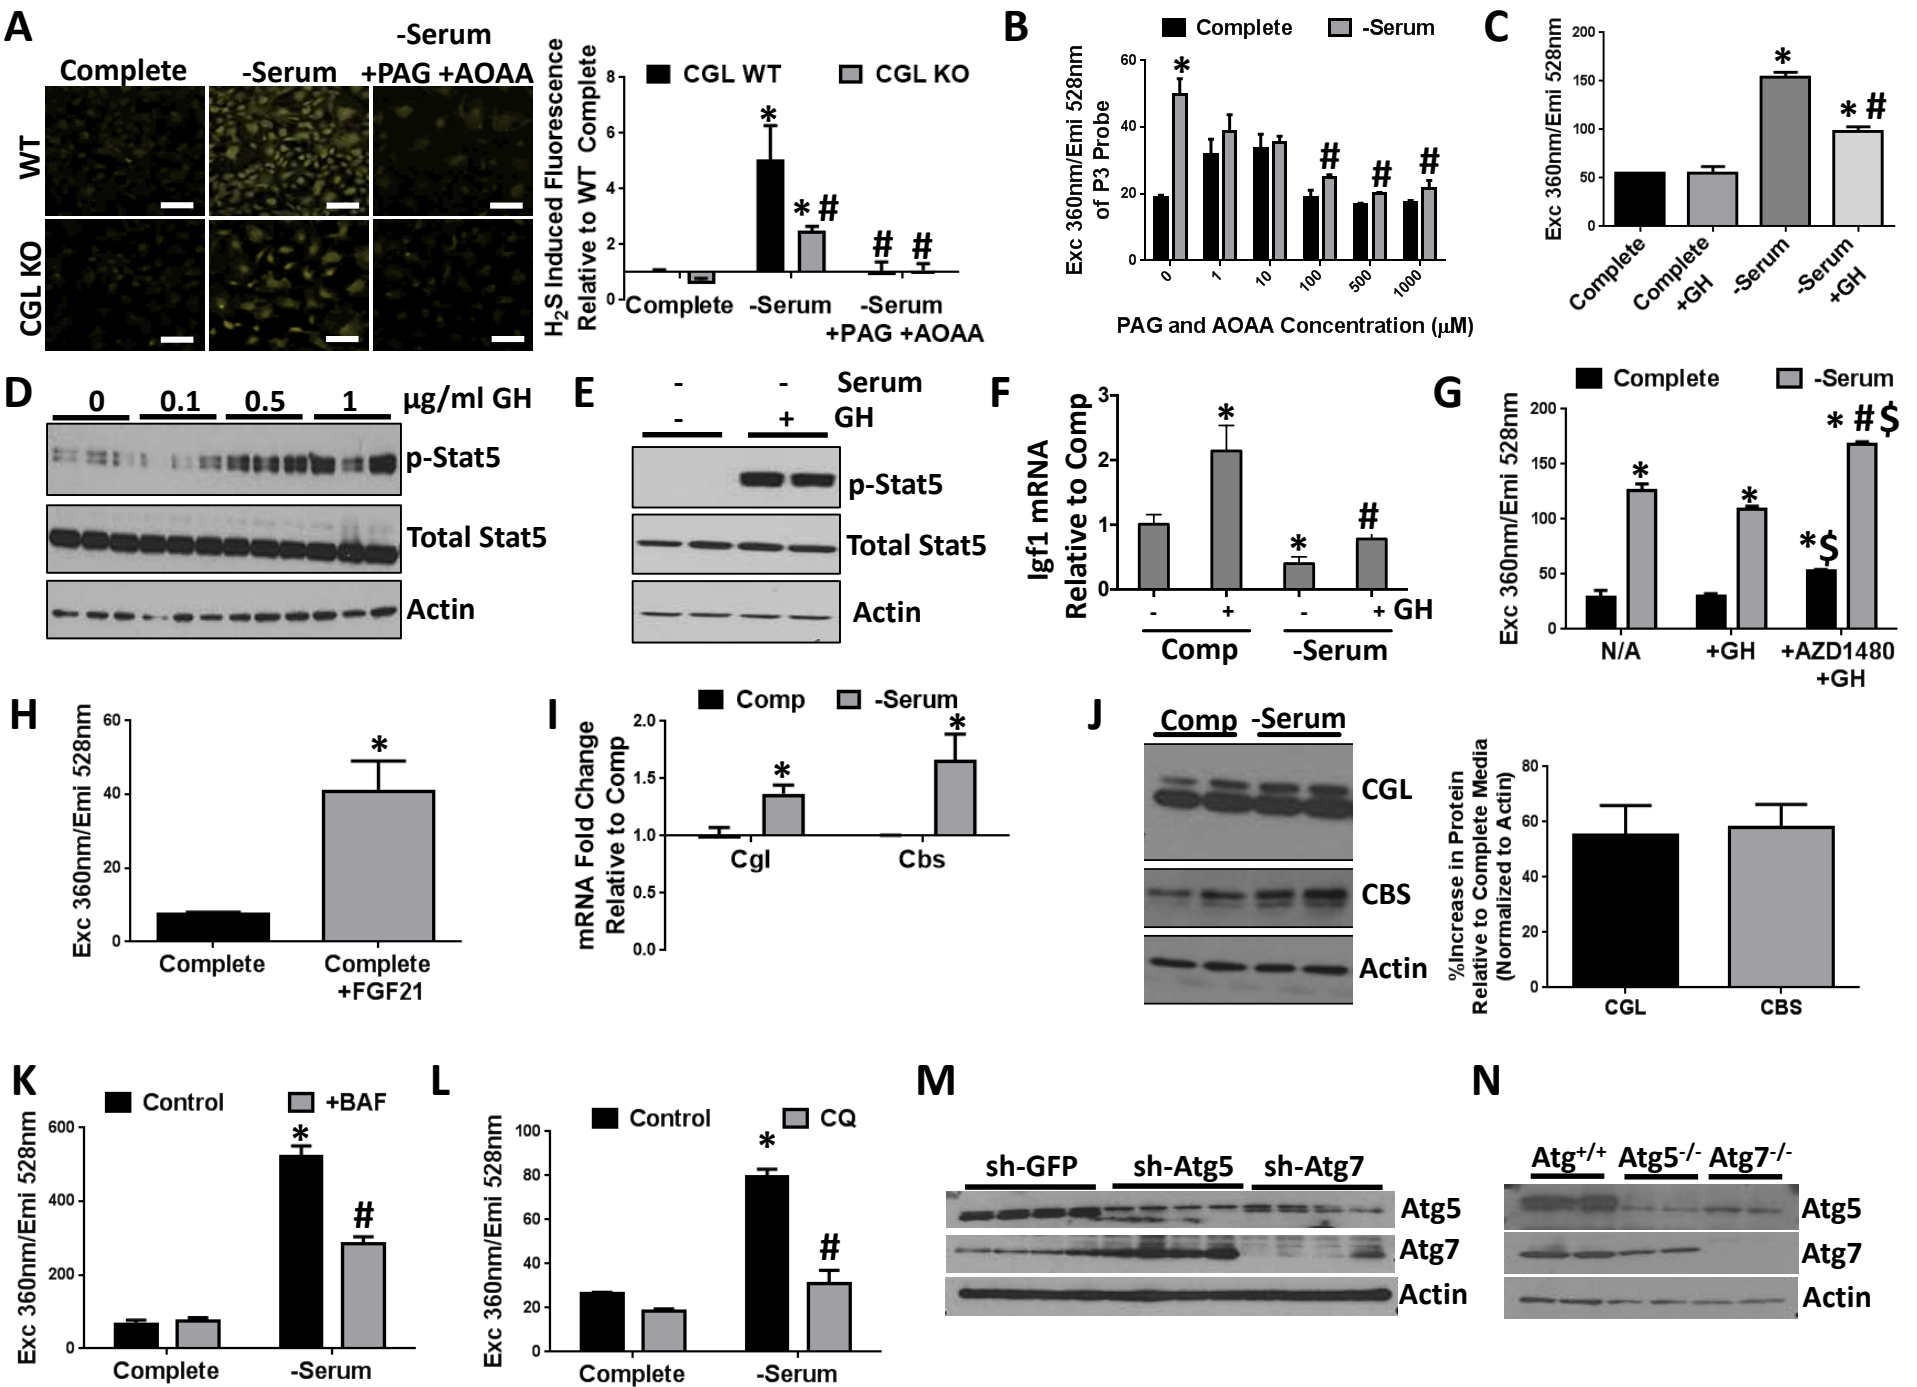

Figure S3

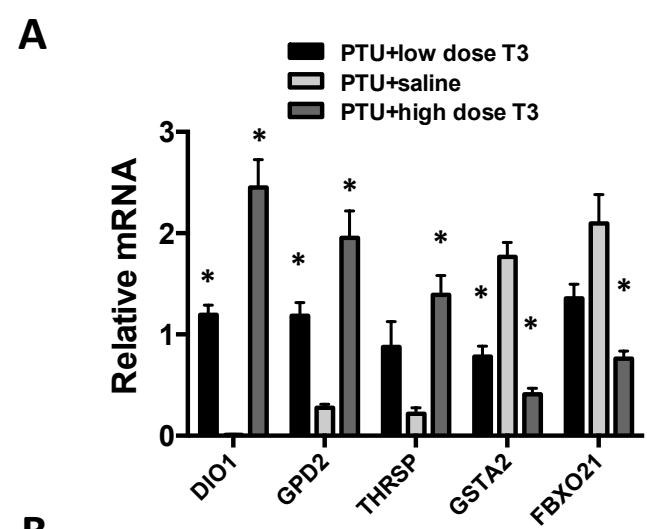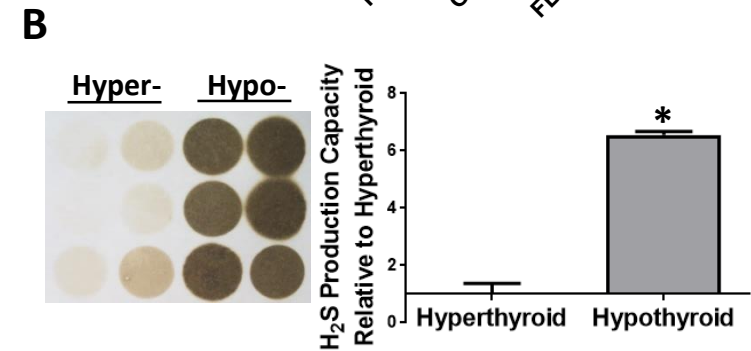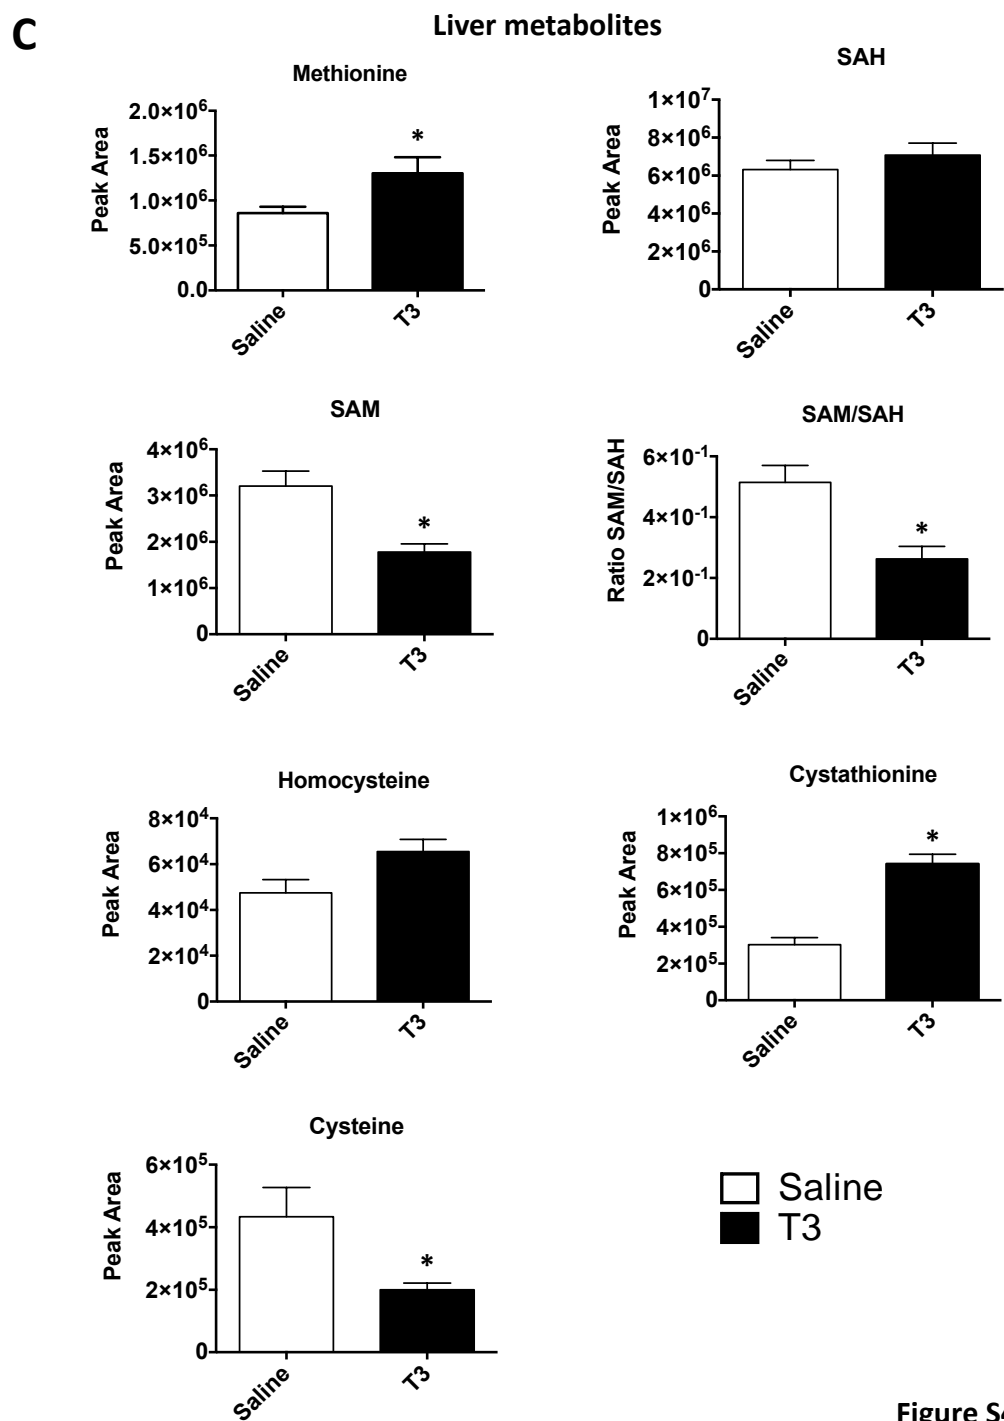

Figure S4

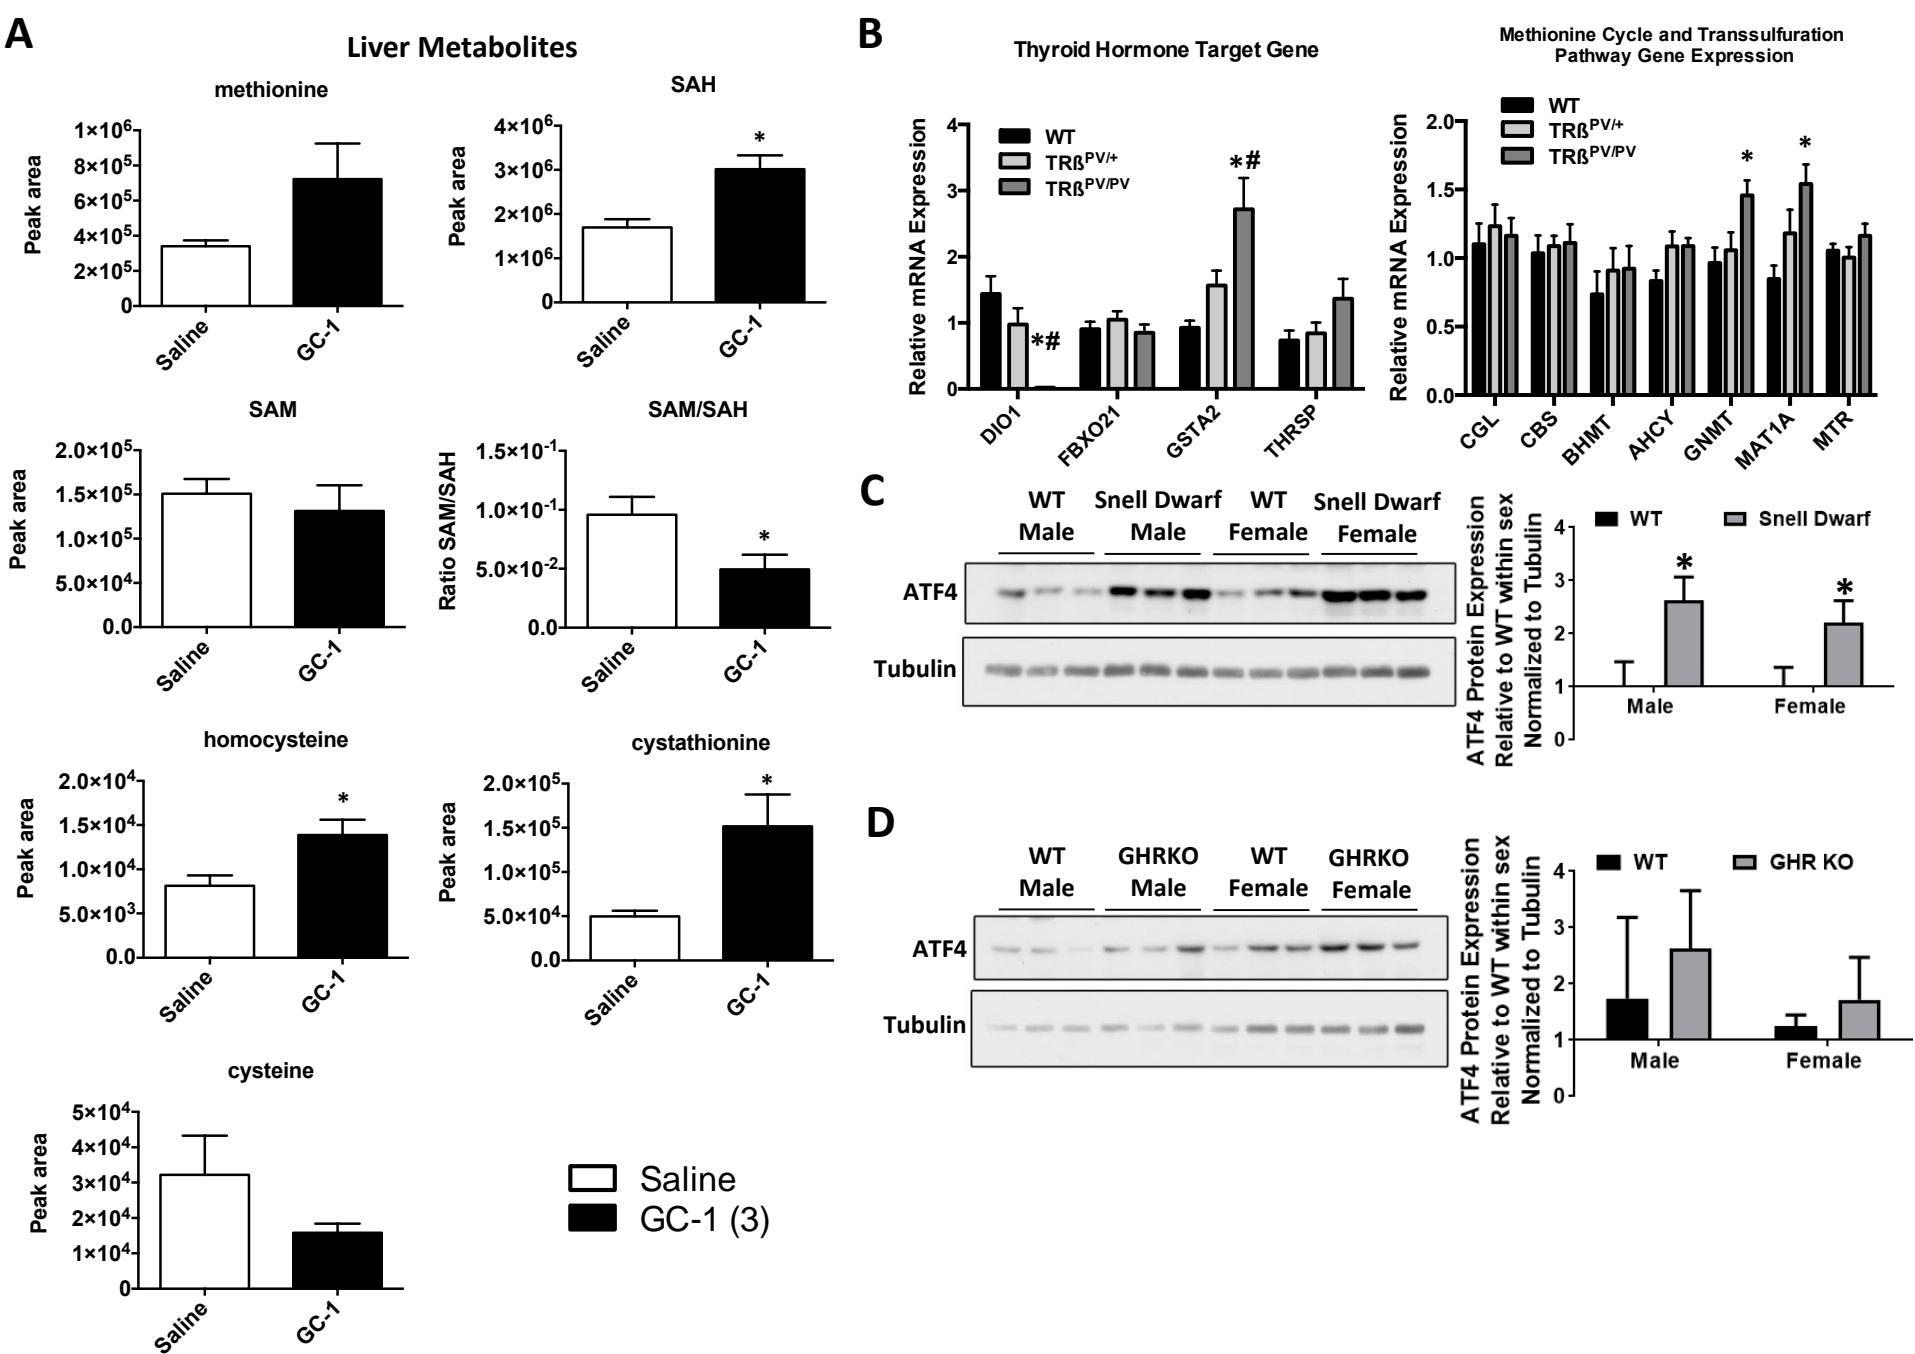

Figure S5

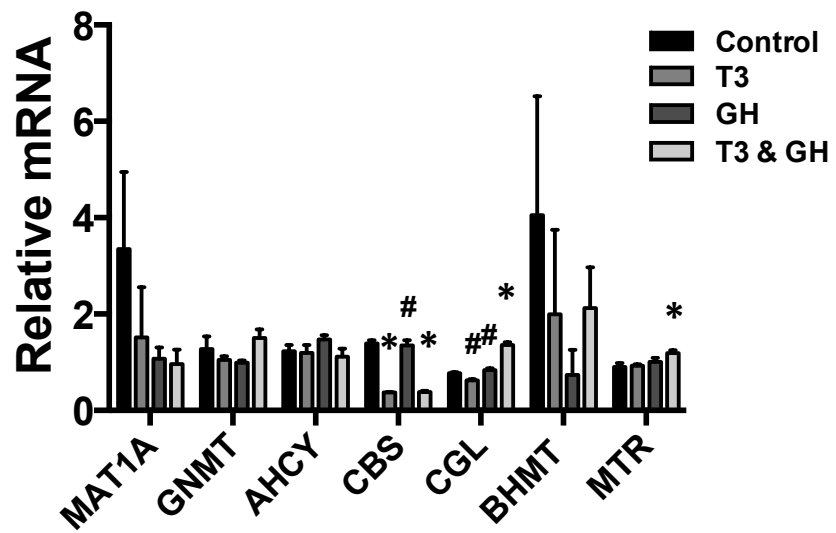

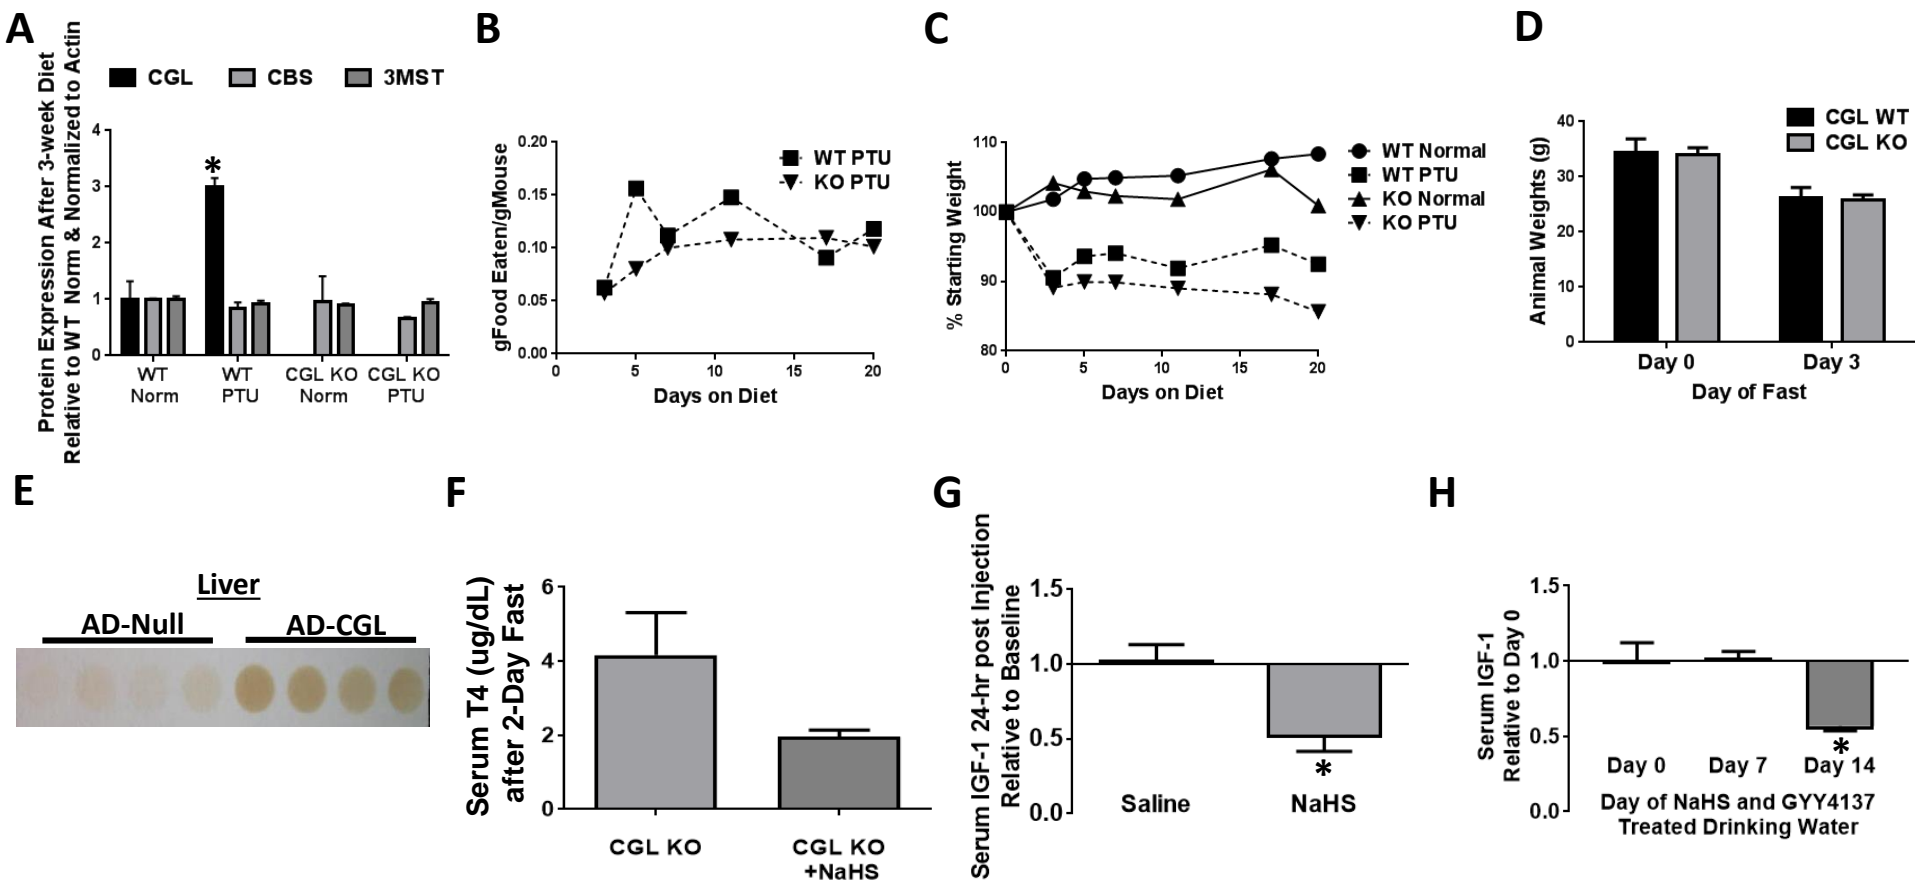

Figure S7



### **Supplemental Figure Legends:**

**Figure S1: Pharmacological impact on hepatic CGL and CBS expression in WT and Dwarf mice.** (A) Liver CGL and CBS protein expression in 18-month old Ames Dwarf and WT mice after early life saline or growth hormone (GH) injection (n=3/group). Asterisk indicates the significance of the difference between WT +Saline and Ames Dwarf +Saline and pound indicates the significance of the difference between +Saline and +GH in the Ames Dwarf groups,  $^{*}/\#p<0.05$ . (B) Liver CGL and CBS protein expression in WT male mice after one-week of saline or lanreotide treatment (n=4/group). Asterisk indicates the significance of the difference between Saline and Lanreotide group,  $^{*}p<0.05$ . (C) %Change in body mass relative to starting weight (n=4/group) and (D) gram of food eaten per gram of mouse body weight (n=4) during the one-week lanreotide treatment. Error bars are +/- standard error of the mean (SEM). *Related to Figure 1*

**Figure S2: Growth Hormone Signaling, but Not Insulin, Represses H<sub>2</sub>S Production Pathways *in vivo*.** (A) Hepatic CGL and CBS protein expression in male mice injected for two weeks with saline, IGF-1, or GH (n=5/group). Asterisk indicates the significance of the difference between the experimental groups and the saline control group,  $^{*}p<0.05$ . (B) Hepatic CGL mRNA expression in control or GH injected rats. Original source data from NCBI GeoProfile GDS862 / 8.2.2.10 / Cth (Ahluwalia, Clodfelter, & Waxman, 2004). Asterisk indicates the significance of the difference between Control and +GH,  $^{*}p<0.05$ . (C) Liver CGL and CBS protein expression from male and female WT and IRS-1 KO mice (n=3/group). Asterisk indicates the significance of the difference between WT and KO within sex,  $^{*}p<0.05$ . (D) Hepatic H<sub>2</sub>S production capacity in WT or liver specific insulin receptor knockout; L-IRKO, mice (n=5). Asterisk indicates the significance of the difference between WT and L-IRKO,  $^{*}p<0.05$ . (E) Analysis of H<sub>2</sub>S producing enzymes CGL and CBS in the livers of WT or FGF21 Over Expressing; OE, mice (n=6). Asterisk indicates the significance of the difference between WT and FGF21 OE,  $^{*}p<0.05$ . Error bars are +/- standard error of the mean (SEM). *Related to Figure 2*

**Figure S3: Growth Hormone Signaling Represses H<sub>2</sub>S Production Pathways *in vitro*.** (A-B) Endogenous H<sub>2</sub>S production in WT or CGL KO primary mouse dermal fibroblasts as measured via florescent probe and 2-photon florescent microscopy (A) or spectrophotometry (B) under different media conditions +/-PAG&AOAA (n=3). Asterisk indicates the significance of the difference between Complete and -Serum, and pound indicates the significance of the difference between CGL WT-Serum and CGL KO-Serum or the -Serum+PAG+AOAA groups,  $^{*}/\#p<0.05$ . Scale bars indicate 100 $\mu$ m. (C) Measurement of endogenous H<sub>2</sub>S production via florescent probe and spectrophotometry (n=3) in mouse primary hepatocytes under various growth conditions +/-Serum+/-GH. Asterisk indicates the significance of the difference between Complete and pound indicates the significance of the difference between -Serum and -Serum+GH;  $^{*}/\#p<0.05$ . (D-E) Western blot analysis of phospho- and total- Stat5 protein expression in primary hepatocytes grown w/ serum (D) and w/o serum (E) as a function of GH addition. (F) *IGF-I* mRNA expression in mouse primary hepatocytes as a function of +/-Serum and +/-GH in the media (n=3). Asterisk indicates the significance of the difference between Comp-GH, and pound indicates the significance of the difference between -Serum-GH and -Serum+GH;  $^{*}/\#p<0.05$ . (G-H) Measurement of endogenous H<sub>2</sub>S production via P3 florescent probe and spectrophotometry in mouse primary hepatocytes under various growth conditions: (G) +/-Serum +/-GH +/-AZD1480, (H) +/-FGF21. Asterisks indicates the significance of the difference between Complete, pound indicates the significance of the differences between -Serum, and dollar sign indicates the significance of the difference between +GH;  $^{*}/\#/\$p<0.05$ . (I) CGL and CBS mRNA expression in primary mouse hepatocytes grown in complete (Comp) media or in media lacking serum (-Serum), (n=3). (J) Western blot analysis of CGL and CBS expression in primary hepatocytes grown in Complete or -Serum media (n=2). (K-L) Measurement of endogenous H<sub>2</sub>S production via florescent probe and spectrophotometry in mouse primary hepatocytes grown in media +/- Serum and +/- the autophagy inhibitor BAF (n=3) (K) or CQ (n=3) (L). Asterisks indicates the significance of the difference between Complete and -Serum and pound sign indicates the significance of the difference between -Serum-BAF and -Serum+BAF (K), or -Serum-CQ and -Serum+CQ (L),  $^{*}/\#/\$p<0.05$ . (M-N) Western blot analysis showing knockdown of ATG5 or ATG7 in hepa1-6 cells with lentiviral shRNA (M) or ATG5 and ATG7 knockout in MEF cells (N). Error bars are +/- standard error of the mean (SEM). *Related to Figure 3*

**Figure S4: Hypothyroidism Boosts and Thyroid Hormone Represses Hepatic H<sub>2</sub>S Production and alters TSP Pathway *in vivo*.** (A) Thyroid hormone receptor target gene mRNA expression (n=4) and (B) fresh homogenate H<sub>2</sub>S production capacity (n=6) in livers from mice under various hypo-, hyper-, or eu-thyroid states. Asterisk indicates the significance of the difference from the hypothyroid (PTU+Saline) state;  $^{*}p<0.05$ . (C) Liver metabolites related to sulfur amino acid metabolism in mice treated with T3 vs. vehicle control (saline) as indicated (n=5/group). Asterisk indicates the significance of the difference between vehicle and +T3;  $^{*}p<0.05$ . Error bars are +/- standard error of the mean (SEM). *Related to Figure 4*

**Figure S5: Hyperthyroidism Modifies the Hepatic Methionine Cycle and Transsulfuration Pathway *in vivo*.** (A) Liver metabolites related to sulfur amino acid metabolism in mice treated with GC-1 vs. vehicle control (saline) as indicated (n=6-8). Asterisk indicates the significance of the difference between vehicle and +GC-1; \*p<0.05. (B) Liver mRNA expression of thyroid hormone target related and sulfur amino acid metabolism related genes as a function of liver thyroid hormone receptor beta (TRb) status (n=4-5/group). Asterisks indicates the significance of the difference from WT and pound indicates the significance of the differences between Het (TRb<sup>PV/+</sup>) and homo (TRb<sup>PV/PV</sup>); \*/#p<0.05. (C,D) Liver ATF4 protein expression from male and female Snell Dwarf and WT (C, n=3/group) and GHRKO and WT (D, n=3/group) mice. Asterisks indicate the significance of the difference between WT and experimental group within sex. \*p<0.05. Error bars are +/- standard error of the mean (SEM). *Related to Figure 5*

**Figure S6: Thyroid Hormone and Growth Hormone Effects on Hepa1 Cell Sulfur Amino Acid Metabolism Genes mRNA Expression.** Analysis of mRNA expression in Hepa1 cells after overnight treatment with T3, GH, or T3 and GH (n=3). Asterisk indicates the significance of the difference from the Control group and pound indicates the significance of the difference from the T3 & GH group; \*/#p<0.05. Error bars are +/- standard error of the mean (SEM). *Related to Figure 6*

**Figure S7: CGL Status Alters the Effects of Experimental Hypothyroidism.** (A) Quantitation of Western blot data on H<sub>2</sub>S producing enzymes normalized to actin (n=3) in the livers of CGL WT and KO mice after 3-weeks of Normal or PTU diet. Asterisk indicates the significance of the difference between Normal and PTU diet groups within genotype; \*p<0.05. (B, C) Food eaten per gram of mouse (n=4-5, B) and changes in body mass (n=4-5, C) in CGL WT and KO mice on Normal or PTU diets for 3-weeks. (D) Body mass of CGL WT and KO mice before and after a 3-day fast (n=3-4/group). (E) Liver H<sub>2</sub>S production capacity from mice injected with AD-Null (control) or AD-CGL (CGL overexpression) 1-week prior (n=4/group). (F) Serum T4 (ug/dL) after a two day fast in CGL KO mice +/- NaHS supplementation (n=4/group). (G-H) Serum IGF-1 in mice treated with a single NaHS injection 24-hours prior (n=4/group, G) and in mice given drinking water supplemented with NaHS and GYY4137 over a two week period (n=4, H). Asterisks indicate the significance of the difference compared to baseline serum IGF-1 levels; \*p<0.05. Error bars are +/- standard error of the mean (SEM). *Related to Figure 7*

| REAGENT or RESOURCE                                                        | SOURCE | IDENTIFIER    |
|----------------------------------------------------------------------------|--------|---------------|
| <b>Oligonucleotides</b>                                                    |        |               |
| IGF-1 F: TGCTTGCTCACCTTCACCA IGF-1 R:<br>CAACACTCATCCACAATGCC              | N/A    | N/A           |
| GHR F: ATTCACCAAGTGTCGTTCCC GHR R:<br>TCCATTCTGGGTCCATTCA                  | N/A    | N/A           |
| CGL F: TTGGATCGAAACACCCACAAA CGL R:<br>AGCCGACTATTGAGGTCATCA               | N/A    | N/A           |
| CBS F: GGGACAAGGATCGAGTCTGGA CBS R:<br>AGCACTGTGTGATAATGTGGG               | N/A    | N/A           |
| HPRT F:TTTCCCTGGTTAAGCAGTACAGCCC HPRT<br>R:TGGCCTGTATCCAACACTTCGAGA        | N/A    | N/A           |
| RPL13 F:TTCGGCTGAAGCCTACCAGAAAGT RPL13<br>R:TCTTCCGATAGTGCATCTTGGCCT       | N/A    | N/A           |
| MAT1A F: GATAGCAGATCTGAGGCGCT MAT1A<br>R: TGCACCATTATCCTGCATGT             | N/A    | N/A           |
| GNMT F: AAGAGGGCTTCAGCGTGATG GNMT R:<br>CTGGCAAGTGAGCAAACTGT               | N/A    | N/A           |
| AHCY F: CGCCAGCATGTCTGATAAAC AHCY R:<br>CCTGGCATCTCATTCTCAGC               | N/A    | N/A           |
| BHMT F: TTAGAACGCTTAAATGCCGGAG BHMT R:<br>GATGAAGCTGACGAACTGCCT            | N/A    | N/A           |
| Cyclophilin F: GGTGGAGAGCACCAAGACAGA<br>Cyclophilin R: GCCGGAGTCGACAATGATG | N/A    | N/A           |
| CGL                                                                        | N/A    | Mm00461247_m1 |
| CBS                                                                        | N/A    | Mm00460654_m1 |
| MTR                                                                        | N/A    | Mm01340053_m1 |
| DIO1                                                                       | N/A    | Mm00839358_m1 |
| GPD2                                                                       | N/A    | Mm00439082_m1 |
| THRSP                                                                      | N/A    | Mm01273967_m1 |
| GSTA2                                                                      | N/A    | Mm00833353_mH |
| FBXO21                                                                     | N/A    | Mm00523921_m1 |

|                                                                                    |     |               |
|------------------------------------------------------------------------------------|-----|---------------|
| TSH alpha                                                                          | N/A | Mm01209400_m1 |
| TSH beta                                                                           | N/A | Mm00437190_m1 |
| PGC-1a                                                                             | N/A | Mm01208835_m1 |
| FGF21                                                                              | N/A | Mm00840165_g1 |
| MAT1A Promoter F: CTCCTCCACTGTCCTTGCTTG<br>MAT1A Promoter R: GGCAGATCTTTGGCAGAATCC | N/A | N/A           |
| MAT1A intron 4 F: CACGTGCATGGGTAGAGGGAC<br>MAT1a intron 4 R: CTTTTCCACCTCCCCGAGGTC | N/A | N/A           |
| GNMT exon 5 F: GGCTCAGGGAATGACGCAACC<br>GNMT exon 5 R: CTCTCCTGCCAAACCACGTCA       | N/A | N/A           |
| CBS intron 1 F: CTTGTGCGGGACCCAGTTGG<br>CBS intron 1 R: GCGAATGTGGCCAGGGTATC       | N/A | N/A           |
| CBS intron 2 F: GCACACCTGACCCTGTATCC<br>CBS intron 2 R: CTGCTGTCCTTGTTGGACT        | N/A | N/A           |
| CGL promoter F: GGGCCTTAAGGCCTGATCTTG<br>CGL promoter R: CAGCACTGAGGTGCAGCACTC     | N/A | N/A           |
| BHMT promoter F: CGCATCCTCATGCAATGATC<br>BHMT promoter R: CTGAGGTCGCTGCTAGCTCGTC   | N/A | N/A           |

**Supplemental Table S1: List of DNA Oligos (Related to STAR Methods Key Resources Table)**
